# Supplementary material for: Verticillin A Causes Apoptosis and Reduces Tumor Burden in High-Grade Serous Ovarian Cancer by Inducing DNA Damage
Source: Oxford University Press journal article supplement (doi:10.1158/1535-7163.mct-19-0205), 2020-01-01
Supplement: 15357163mct190205-sup-217910_3_supp_5722700_pwjjzd.docx [file 15357163mct190205-sup-217910_3_supp_5722700_pwjjzd.docx]

**Supplementary figures:**

**
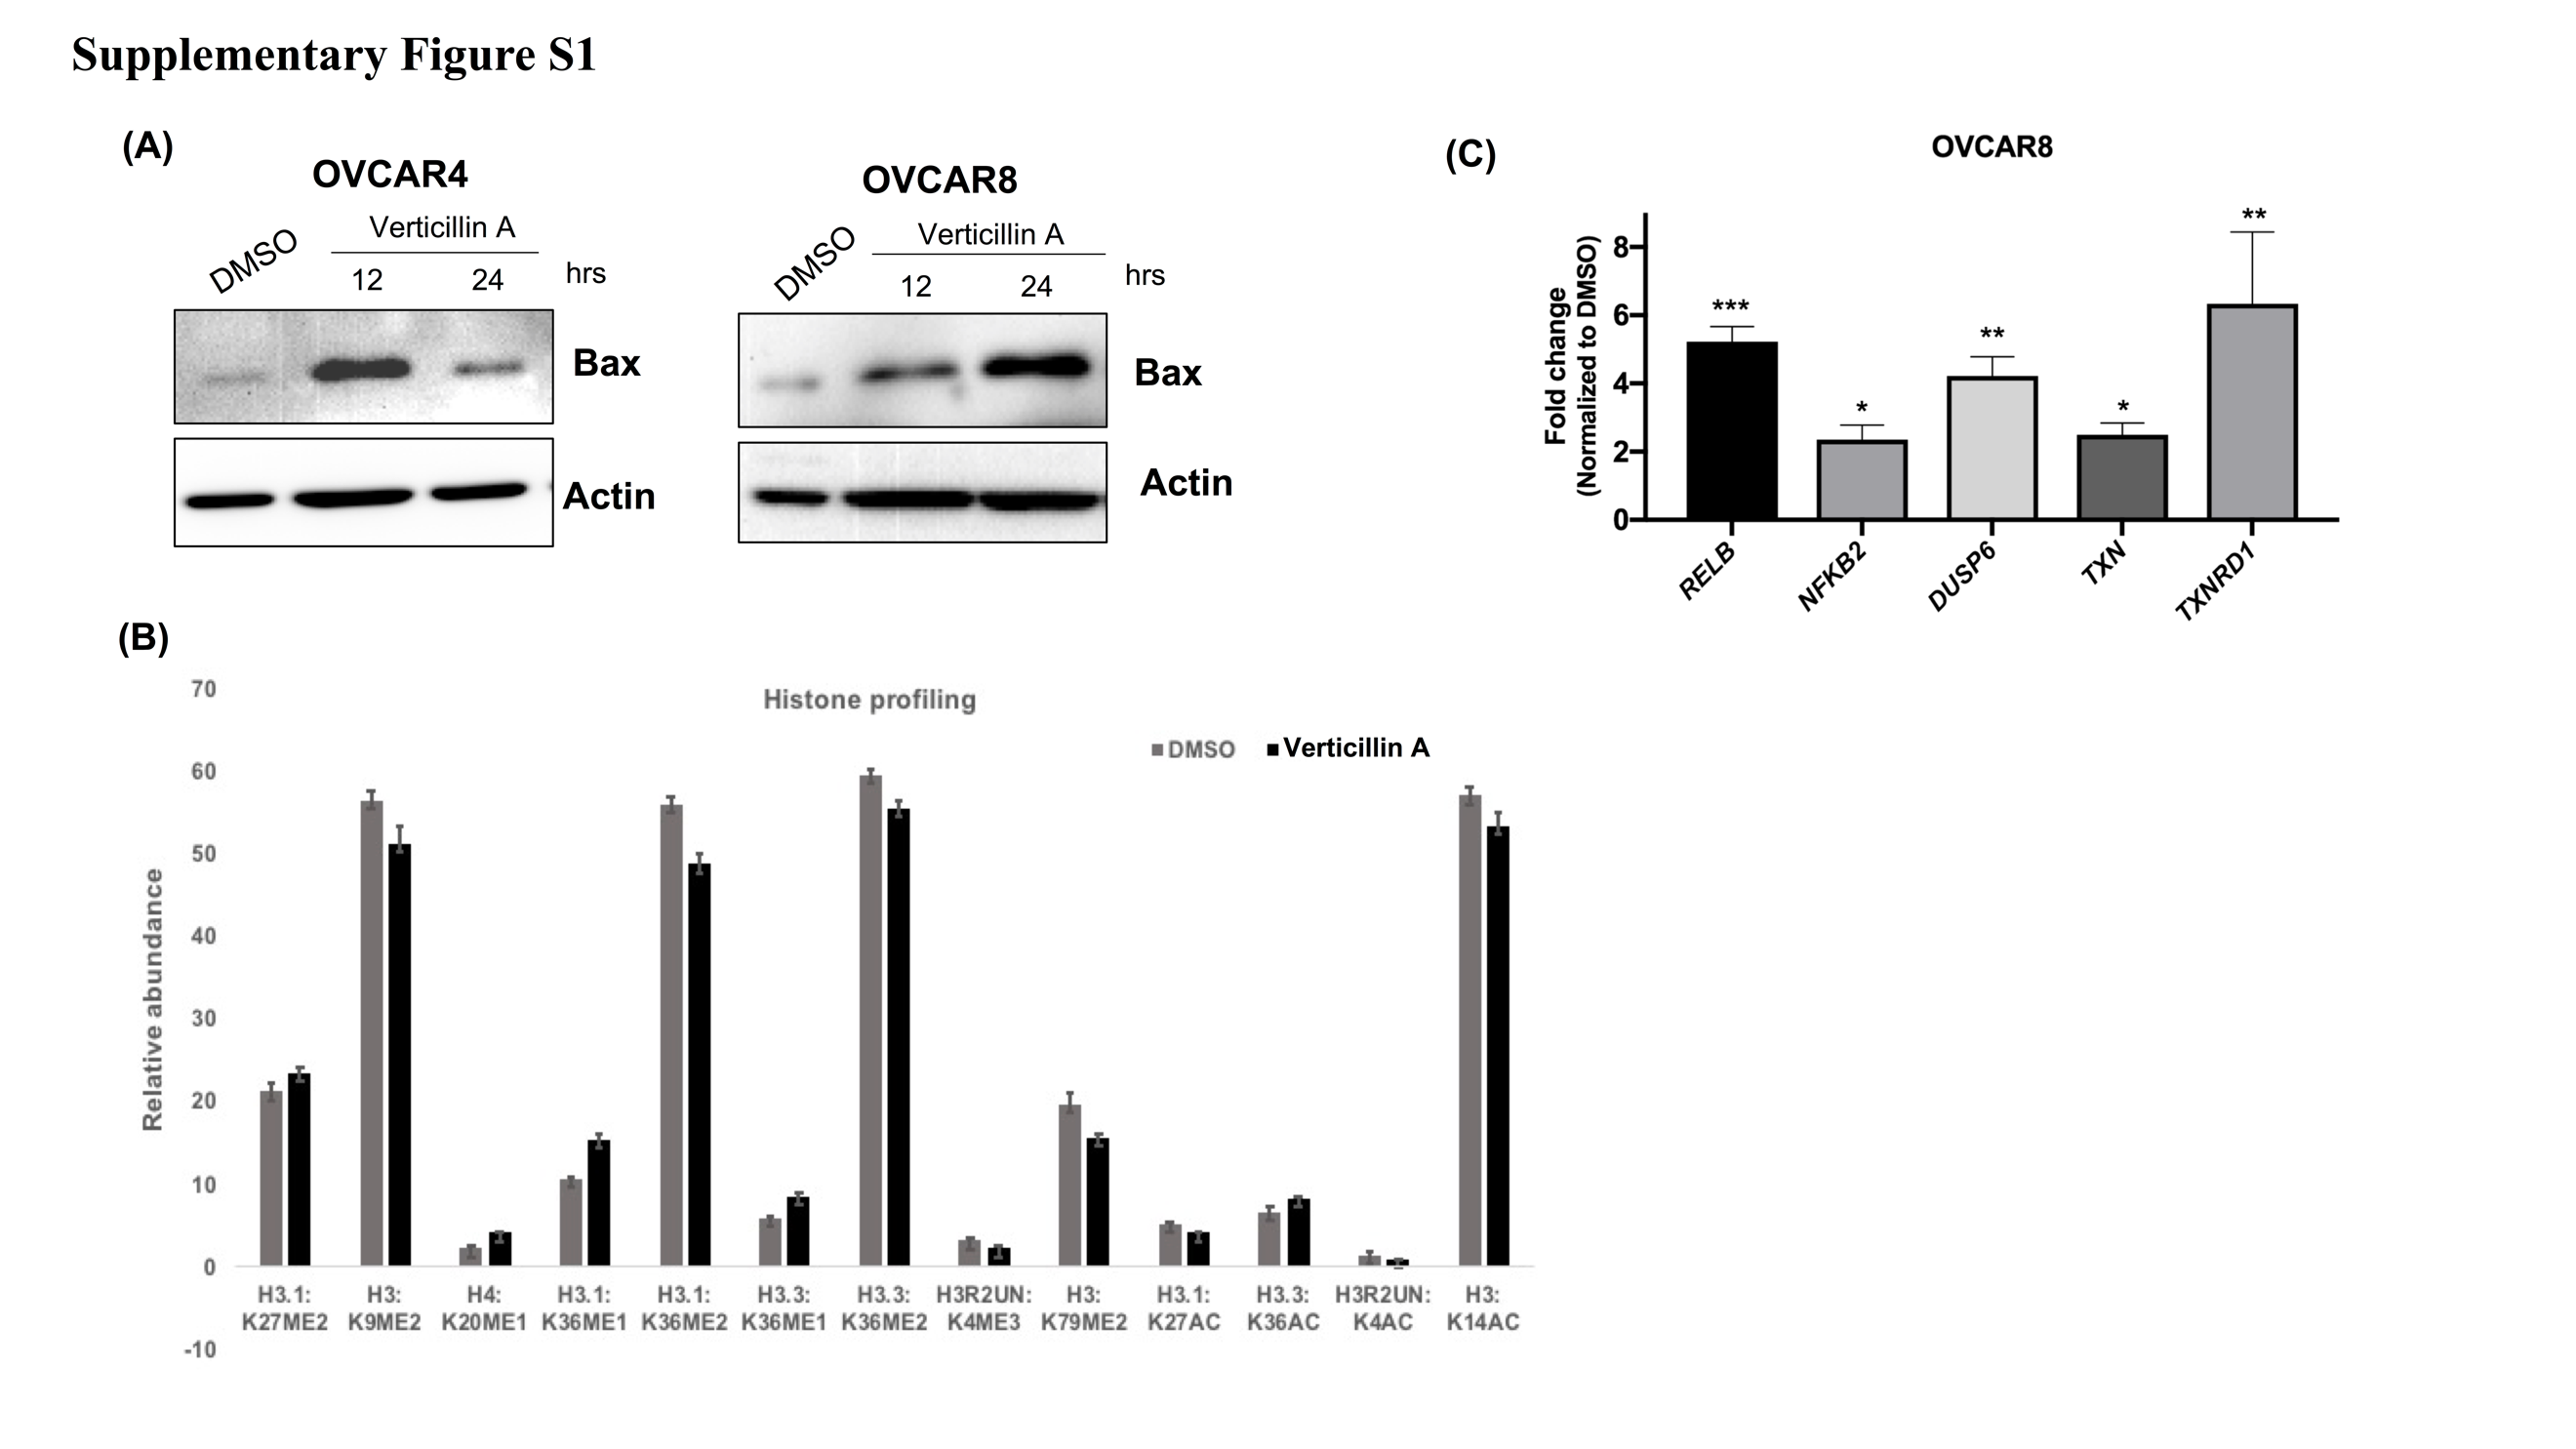
**

**Supplementary Figure S1**

(A) Immunoblot analysis of whole cell lysates of OVCAR4 and OVCAR8 cells treated with vehicle (DMSO) and verticillin A (50 nM) and probed for apoptotic marker (Bax). Actin was used as a loading control. (B) OVCAR8 cells were treated with vehicle control (DMSO) and verticillin A (50 nM) for 24 hrs and 1x106 cells were used for histone extraction. Graph represents differential expression mass spectrometry analysis of histone post-translational modifications. Error bars represent standard deviation obtained from 3 technical replicates of each sample. (C) qRT-PCR validation of genes in apoptosis signaling (*NFKB2*, *RELB*) and oxidative stress response pathway (*TXN, DUSP6* and *TXNRD1*) for OVCAR8 cells treated with vehicle control (DMSO) and verticillin A (50 nM) for 24 hrs. Data represent mean ± SEM. Significance tested by Student’s t-test in comparison to vehicle control.


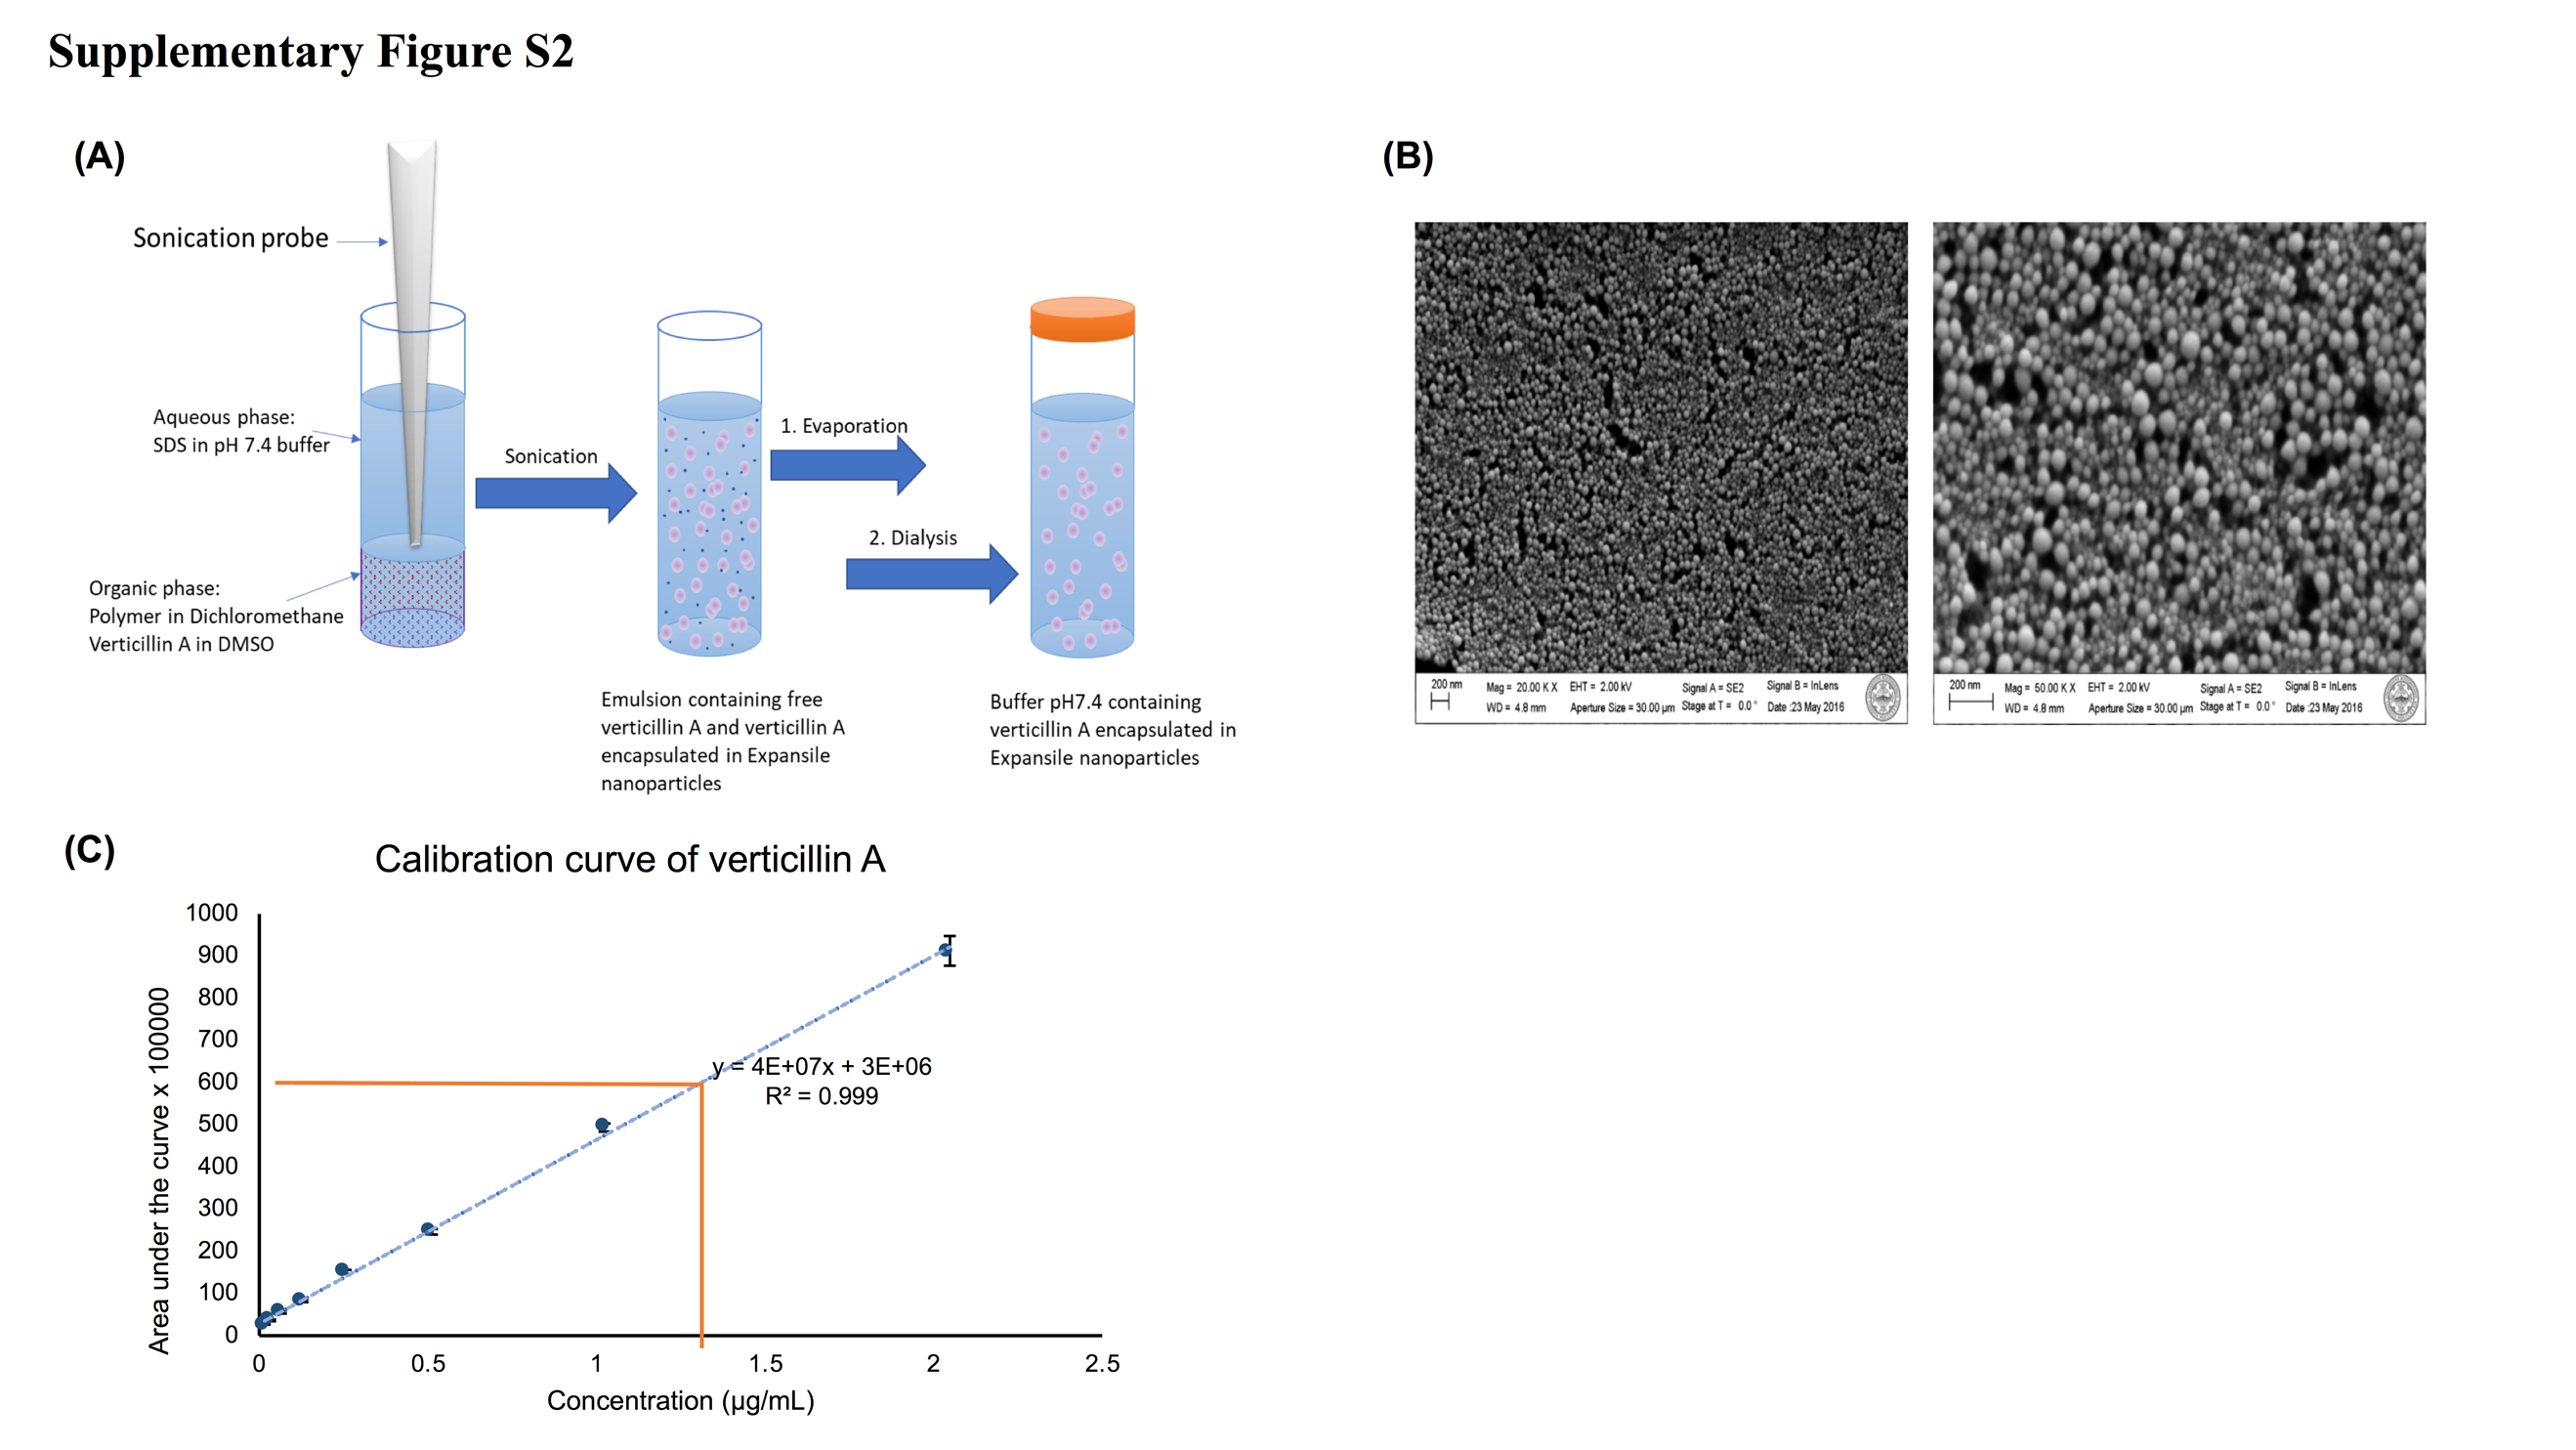


**Supplementary Figure S2**

(A)Verticillin A-eNP synthesis followed a modified procedure developed by Colby *et al* (17,18). The aqueous phase contains surfactant while the organic phase contains the pre-polymerized eNP polymer and verticillin A. This solution was emulsified with a probe sonicator to create a suspension of organic phase droplets in the aqueous phase. The organic solvent was evaporated, leaving behind verticillin A encapsulated inside eNPs. Finally, a last step of dialysis was done on the solution to eliminate the verticillin A molecules that escaped encapsulation during the sonication process. (B) Scanning electron micrograph of verticillin A expansile nanoparticles showing spherical particles of approximately 100 nm at pH 7.4. The right picture is a zoom in of a spot shown on the left picture. Scale bar: 200 nm. (C) Calibration curve for verticillin A, as measured via UPLC-HRMS, using a Waters Acquity UPLC system coupled with a Thermo Q-Exactive Plus mass spectrometer. The instrument was operated under positive mode using selected ion monitoring (SIM) of verticillin A [(M+H)+, *m/z* of 697.10]. To build the calibration curve, 3 µl of each concentration was analyzed in triplicates. These data represent mean ± SD, and the orange line represents the amount of verticillin A in the diluted solution (1.29 µg/ml). In sum total, there was 0.91 mg of verticillin A per ml of eNP solution, representing an encapsulation efficiency of 76.9%.


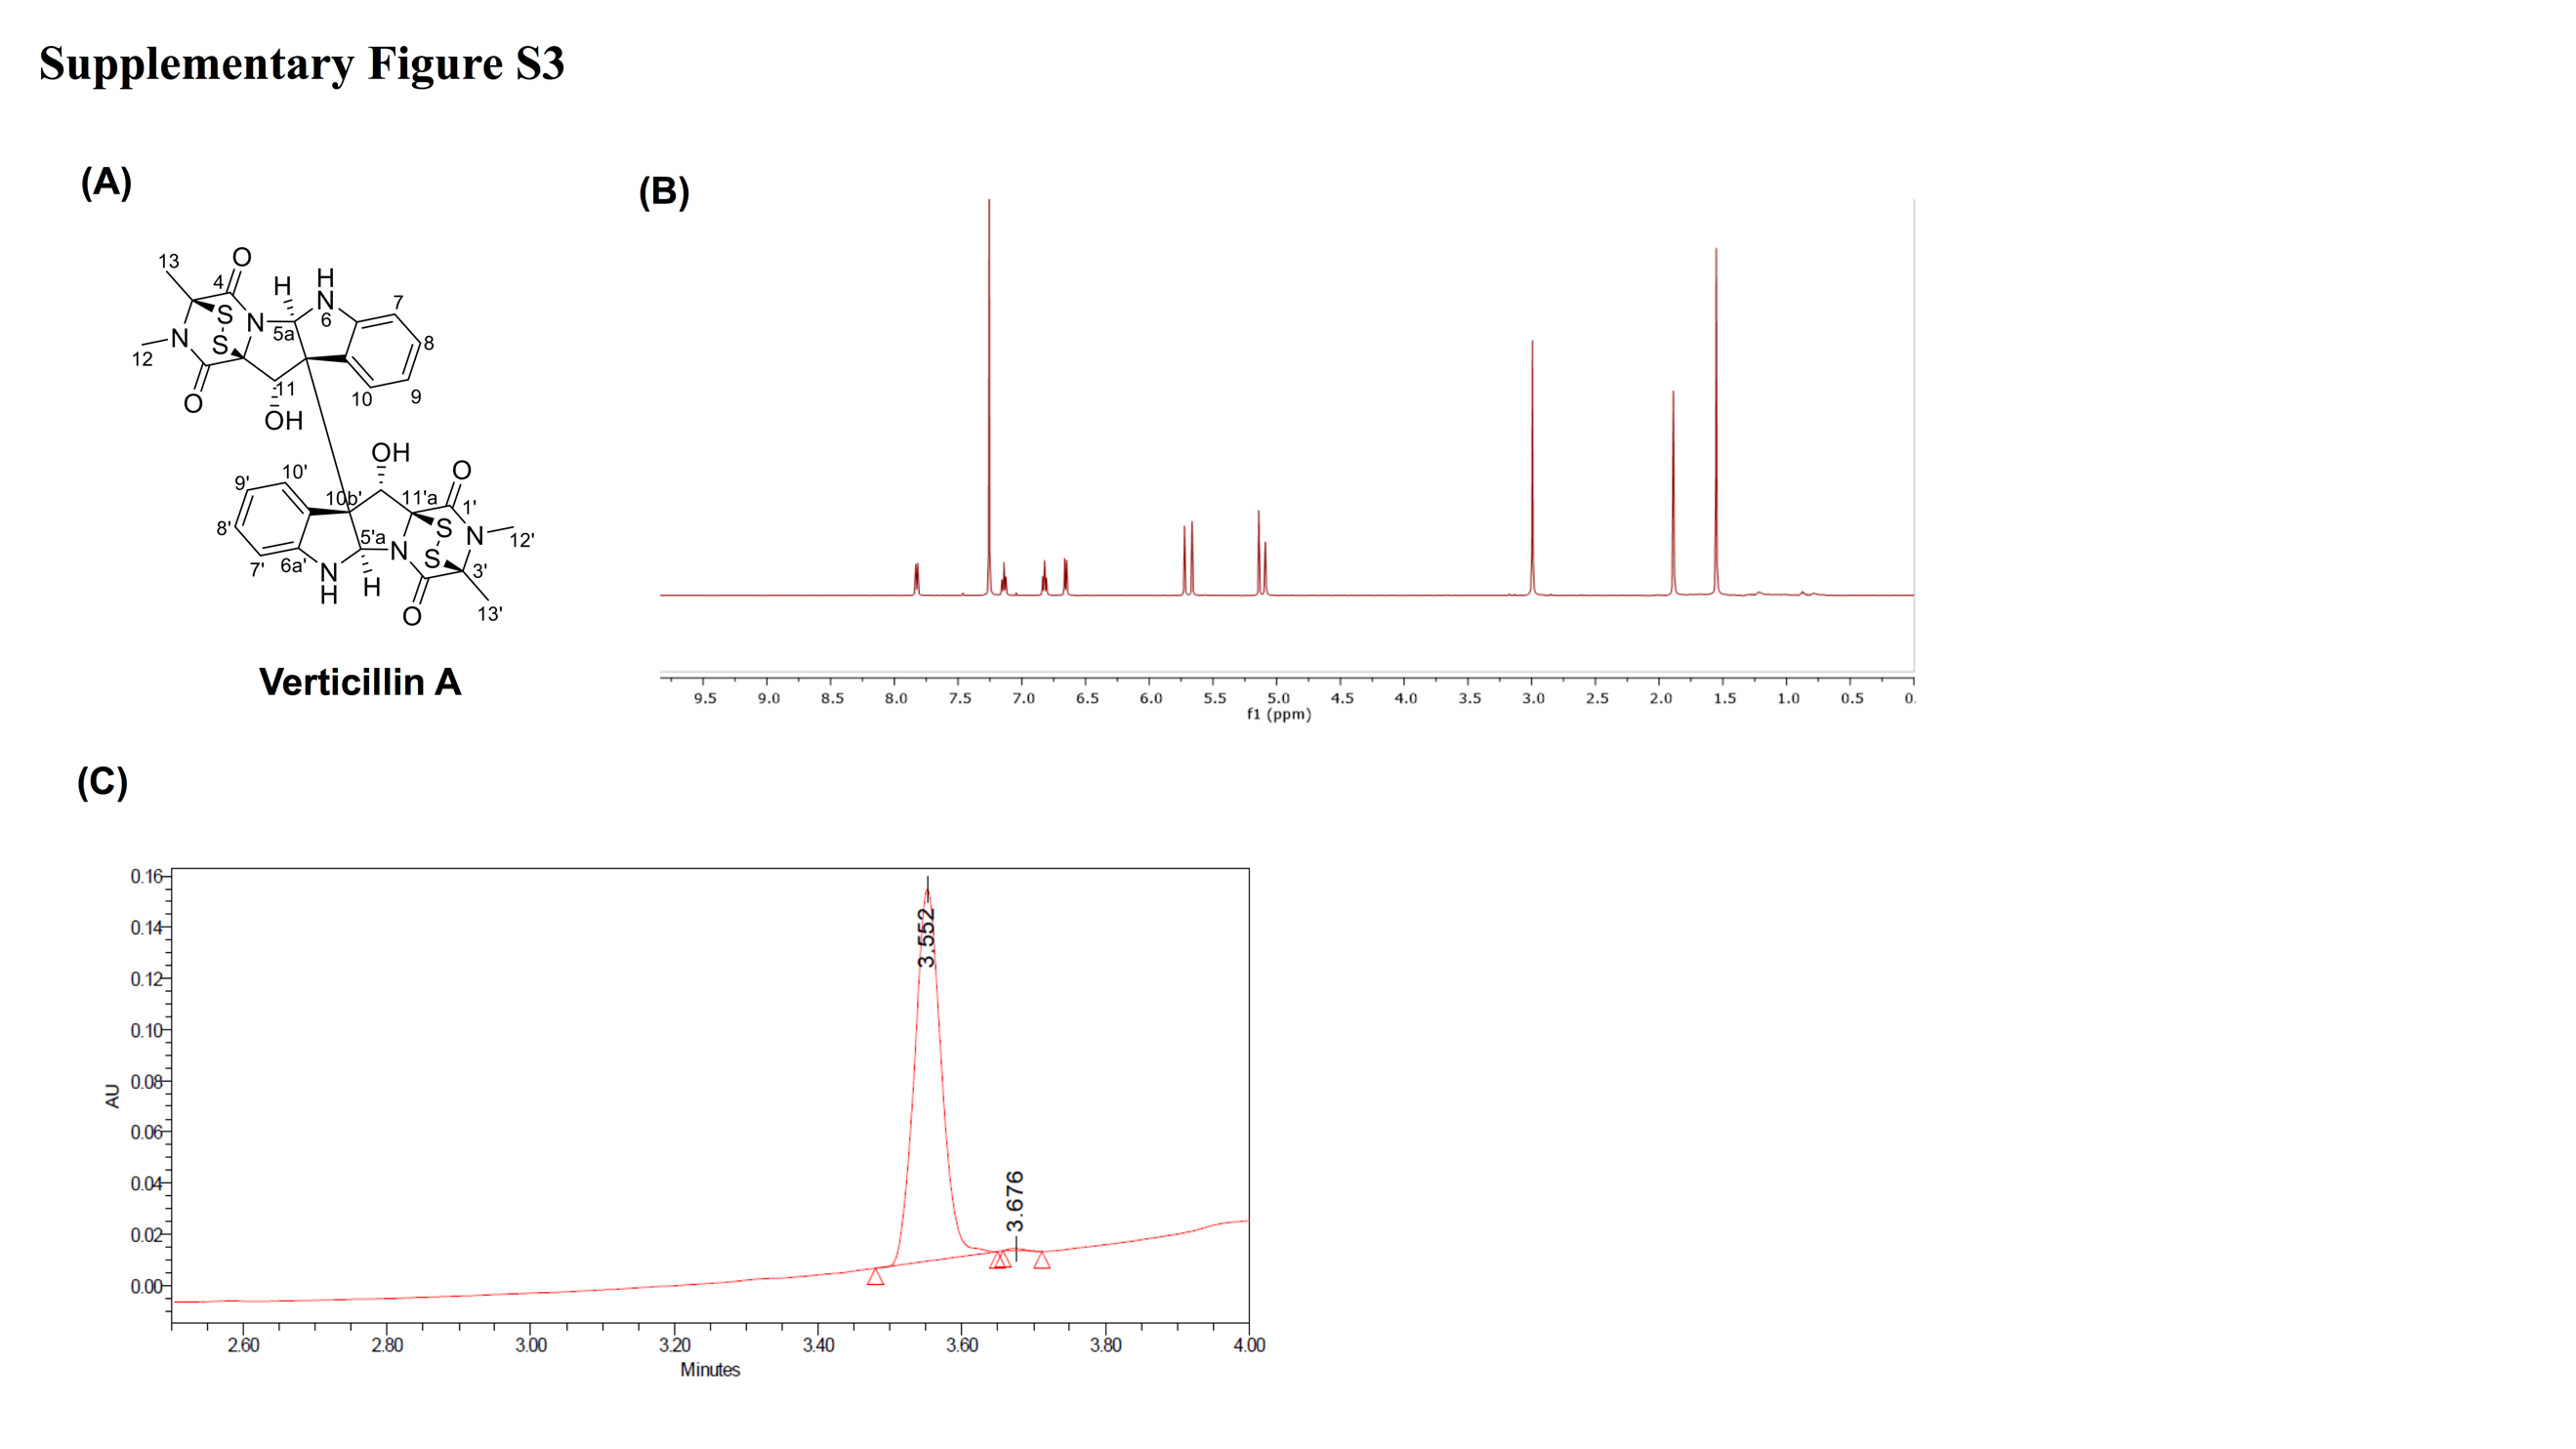


**Supplementary Figure S3**

(A) Structure of verticillin A. (B) 1H-NMR data of verticillin A analyzed in CDCl3 (δH 7.26 ppm) using a JOEL 500 MHz instrument. (C) A Waters Acquity UPLC system was used to analyze the verticillin A used in the encapsulation process to synthesize eNPs loaded with 5% of the compound. Verticillin A eluted at 3.55 min when analyzed using a gradient UPLC system that initiated with 40:60 MeOH:H2O with 0.1% formic acid on a HSS PFP column (1.8 µm, 2.1 x 100), then increased linearly to 60:40 MeOH:H2O with 0.1% formic acid over 4.00 min. Both figures indicate that the purity of verticillin A was greater than 95%.


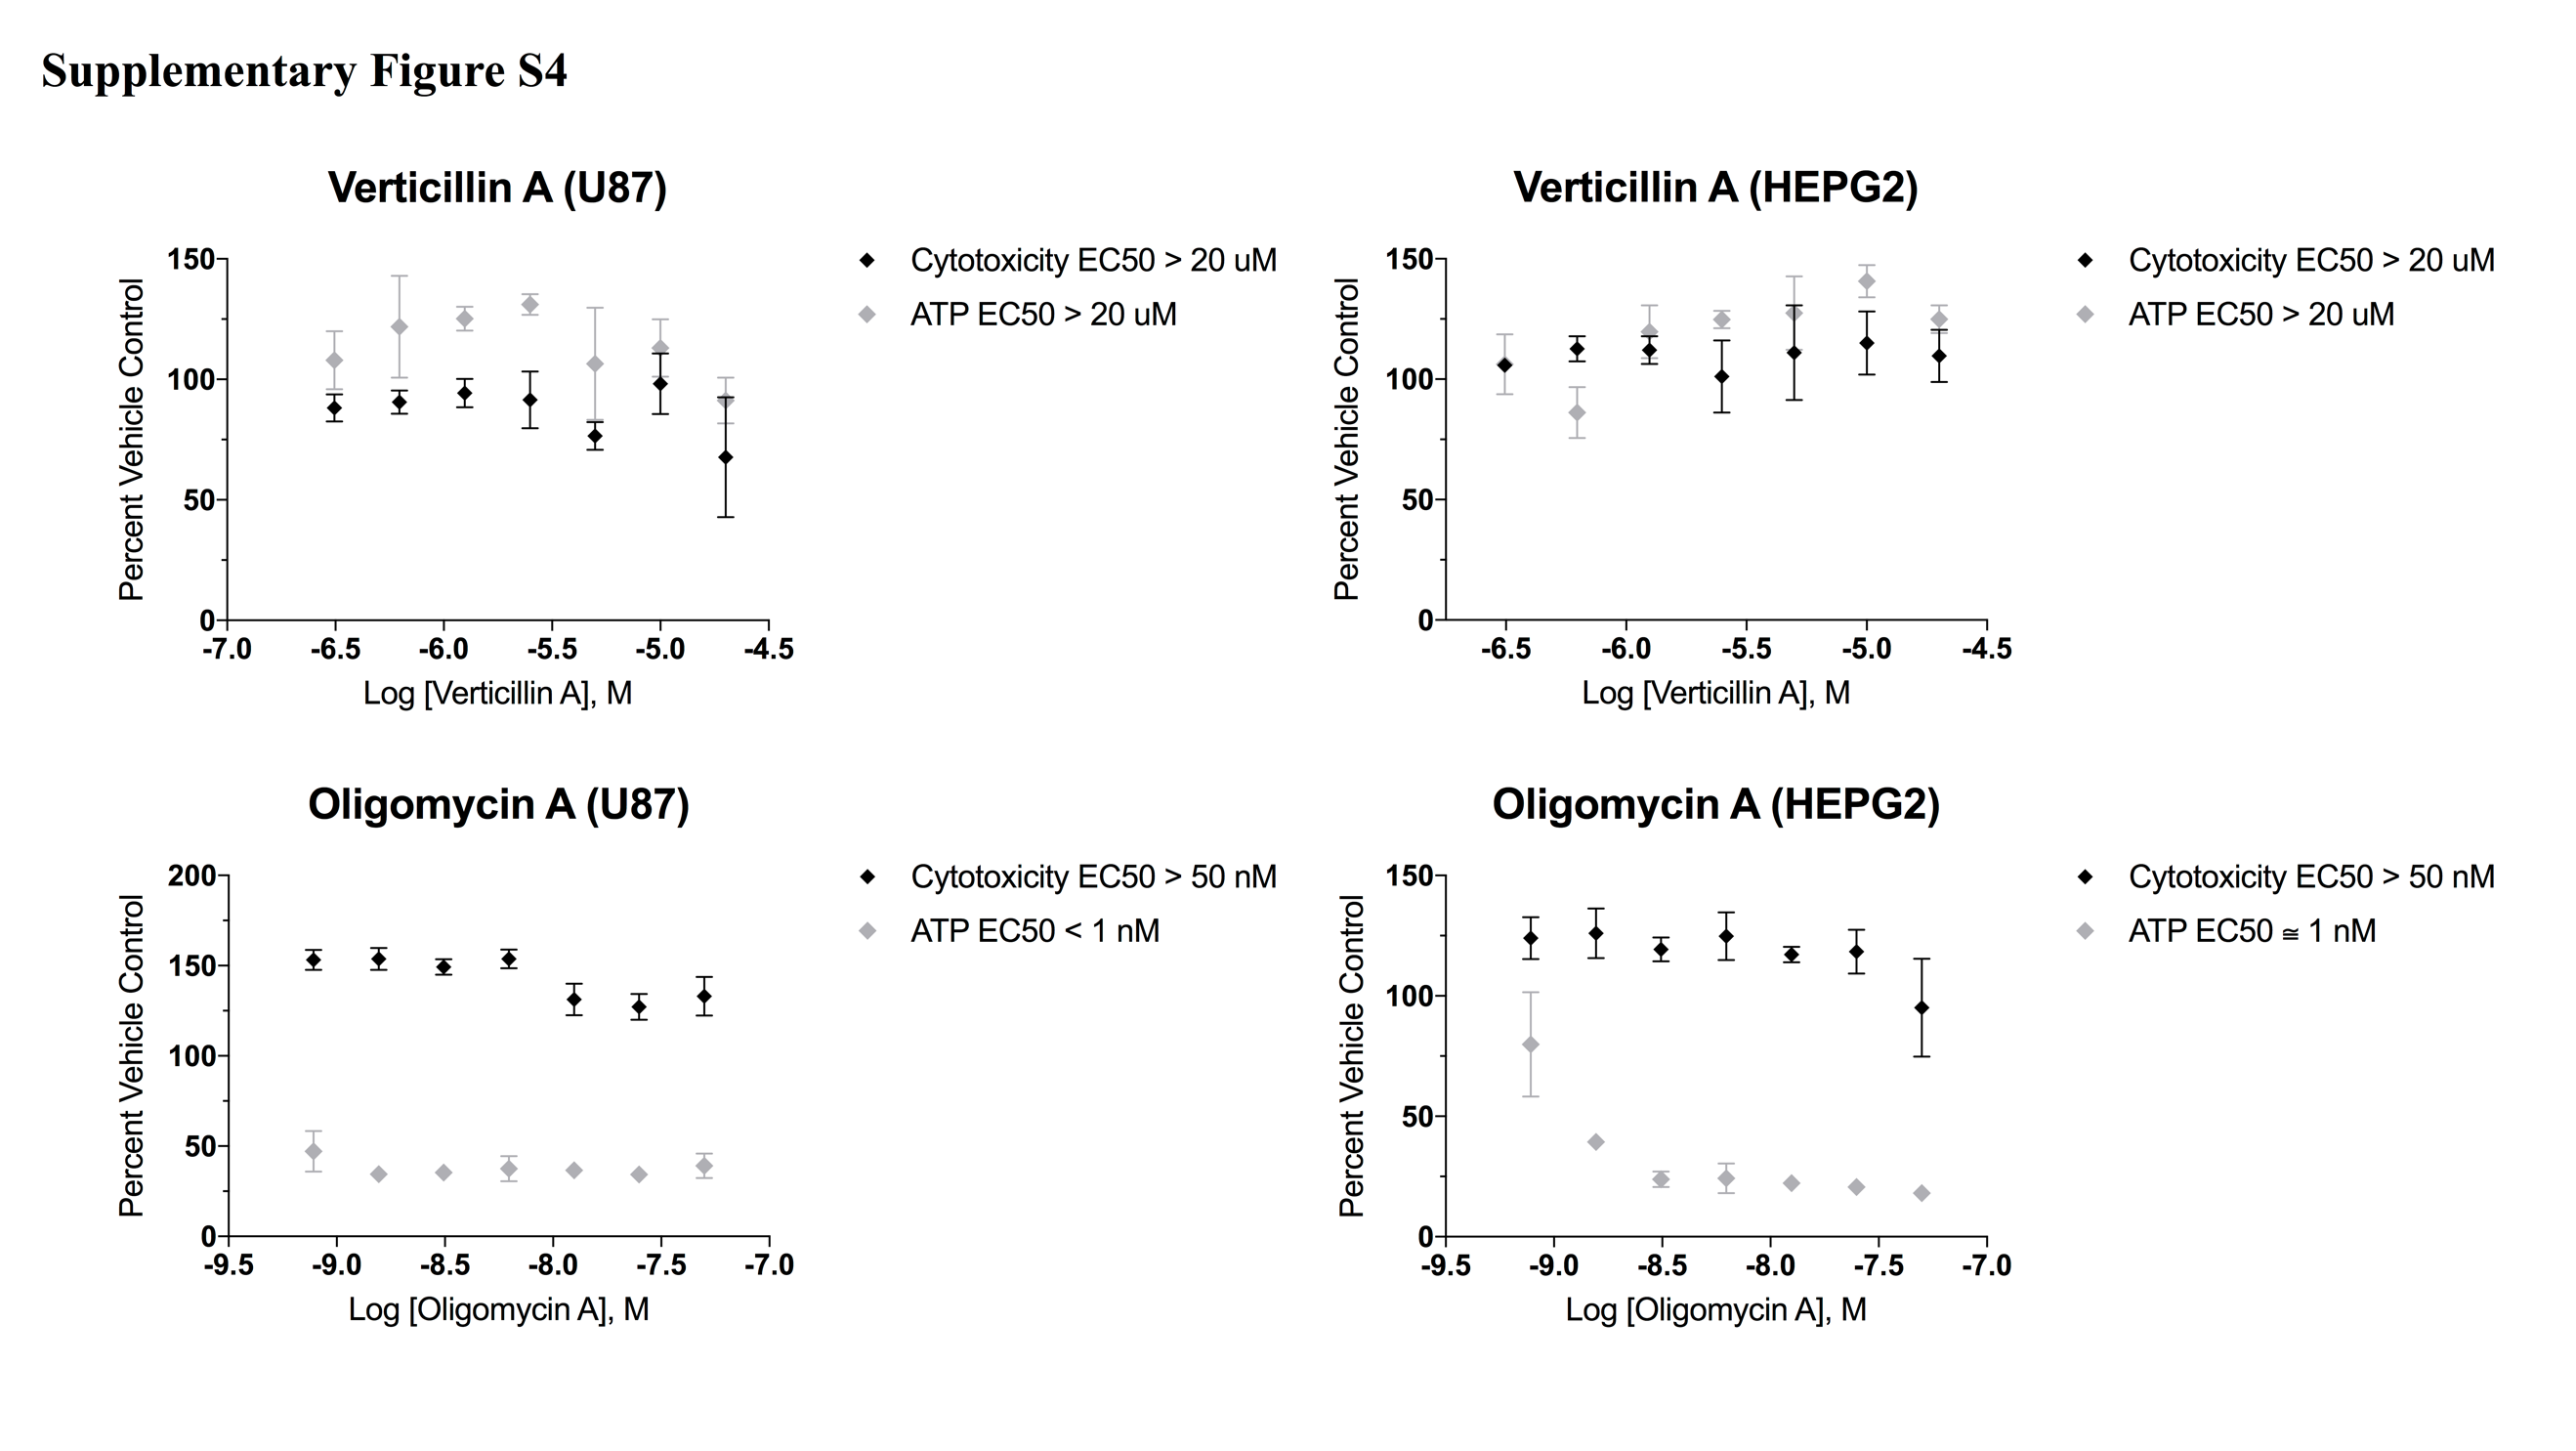


**Supplementary Figure S4**

Mitochondrial toxicity assay was performed in U87 and HEPG2 cells using Mitochondrial ToxGloTM kit. Cell membrane integrity and ATP levels were measured using fluorescent and luminescent substrate respectively. Verticillin A treatment showed no changes in ATP levels or membrane integrity indicating no mitochondrial toxicity. Oligomycin was used as a positive control and showed mitochondrial toxicity.
